# Supplementary material for: Association between neuraxial anaesthesia or general anaesthesia for lower limb revascularisation surgery in adults and clinical outcomes: population based comparative effectiveness study
Source: PubMed Central journal article supplement — BMJ. 2020 Nov 25;371:m4104. doi: 10.1136/bmj.m4104 (PMC7687020; doi:10.1136/bmj.m4104), 2020-11-25
Supplement: robd056298.ww.pdf [file robd056298.ww.pdf]

## List of eTables and eFigures

### eTables:

**eTable 1.** Diagnostic codes for complications.

**eTable 2.** Form of all covariates.

**eTable 3.** Mixed-effects regression model examining the adjusted association between anesthetic type and 30-day mortality among the 20,988 study patients.

**eTable 4.** Characteristics of the propensity score-matched cohorts.

**eTable 5.** Characteristics of the 13,176 study patients  $\geq 65$ -years old with outpatient prescription drug data stratified by anesthetic technique.

**eTable 6.** Mixed-effects regression model examining the adjusted association between anesthetic type and 30-day mortality among the 13,176 patients  $\geq 65$ -years old with outpatient prescription drug data.

**eTable 7.** Incidence of secondary outcomes and results of mixed-effects regression models examining differences in these outcomes between groups.

### eFigures:

**eFigure 1.** Loess smoothed plot of the percentage of neuraxial anesthesia, anticoagulant, and antiplatelet use across the study period. Shaded areas around the plotted line represent 95% confidence intervals.

**eTable 1. Diagnostic Codes for Complications.**

| <b>Outcome</b>                         | <b>Description</b>                                    | <b>Codes</b>                                     |
|----------------------------------------|-------------------------------------------------------|--------------------------------------------------|
| In-hospital coronary revascularization | Revascularization (within index DAD record)           | CCI code IJ50 or IJ57GQ)                         |
| In hospital acute kidney injury        | Acute Kidney Injury (within index DAD record)         | N17 with Diagnosis type=2                        |
| In hospital myocardial infarction      | Major adverse cardiac event (within index DAD record) | I21, I22, I20, I23.82, I24 with Diagnosis type=2 |
| In hospital ventricular arrhythmia     | New cardiac ventricular arrhythmia (within index DAD) | I490, with Diagnosis type=2                      |
| In hospital heart failure              | New heart failure (within index DAD)                  | I50, with Diagnosis type=2                       |
| In hospital ischemic stroke            | New stroke (within index DAD)                         | I63, I64 with Diagnosis type=2                   |
| In hospital hemorrhagic stroke         | New stroke (within index DAD)                         | I60, I61, I62 with Diagnosis type=2              |
| In hospital transient ischemic attack  | New transient ischemic attack (within index DAD)      | G45 with Diagnosis type=2                        |
| In hospital pneumonia                  | New pneumonia (within index DAD)                      | J12, J13, J14, J15, J16,                         |
|                                        |                                                       | J17, J18, P23 with Diagnosis type=2              |
| In hospital pulmonary embolism         | New pulmonary embolus (within index DAD)              | I26 with Diagnosis type=2                        |

|                                  |                                             |                                                                             |
|----------------------------------|---------------------------------------------|-----------------------------------------------------------------------------|
| In hospital deep vein thrombosis | new deep vein thrombosis (within index DAD) | DXCODE (i) = I801; I802; I808; I822; I823; I828; I829 with Diagnosis type=2 |
| DAD: discharge abstract database |                                             |                                                                             |

**eTable 2.** Form of all Covariates.

| <b>Covariate</b>                                                    | <b>Form</b>                          |
|---------------------------------------------------------------------|--------------------------------------|
| Neuraxial instead of general anesthesia                             | Binary                               |
| <i>Demographics and hospital surgical volume</i>                    |                                      |
| Age                                                                 | Restricted cubic spline with 5 knots |
| Female                                                              | Binary                               |
| Urban instead of rural residence                                    | Binary                               |
| Long-term care facility resident                                    | Binary                               |
| Income quintile                                                     | 5-level categorical                  |
| Smoking cessation consultation in the year before surgery           | Binary                               |
| Hospital lower limb revascularization surgery volume                | Restricted cubic spline with 5 knots |
| Hospital-patient One-Year Mortality Risk score (per-point increase) | Continuous                           |
| <i>Comorbidities recorded in the 3-years before surgery</i>         |                                      |
| Alcohol abuse                                                       | Binary                               |
| Atrial fibrillation                                                 | Binary                               |
| Blood loss anemia                                                   | Binary                               |
| Cancer                                                              | Binary                               |
| Cardiac valvular disease                                            | Binary                               |
| Cerebrovascular disease                                             | Binary                               |
| Chronic kidney disease                                              | Binary                               |
| Chronic obstructive pulmonary disease                               | Binary                               |
| Coagulopathy                                                        | Binary                               |
| Deficiency anemia                                                   | Binary                               |
| Dementia                                                            | Binary                               |
| Depression                                                          | Binary                               |
| Diabetes                                                            | Binary                               |
| Dialysis                                                            | Binary                               |
| Drug abuse                                                          | Binary                               |
| Frailty                                                             | Binary                               |
| Heart failure                                                       | Binary                               |
| Hemiparesis or hemiplegia                                           | Binary                               |
| Hypertension                                                        | Binary                               |
| Liver disease                                                       | Binary                               |
| Metastatic cancer                                                   | Binary                               |
| Myocardial infarction                                               | Binary                               |
| Obesity                                                             | Binary                               |
| Peptic ulcer disease                                                | Binary                               |
| Previous diagnosis of peripheral artery disease                     | Binary                               |
| Psychosis                                                           | Binary                               |

|                                                      |                                      |
|------------------------------------------------------|--------------------------------------|
| Pulmonary circulatory disease                        | Binary                               |
| Rheumatic disease                                    | Binary                               |
| Venous thromboembolism                               | Binary                               |
| Weight loss                                          | Binary                               |
| <i>Healthcare resource use</i>                       |                                      |
| Emergency Department visit in last year              | Binary                               |
| Hospitalization in last year                         | Binary                               |
| Resource utilization band                            | 5-level categorical                  |
| <i>Lower limb revascularization surgery</i>          |                                      |
| Surgical urgency                                     | 4-level categorical                  |
| Procedure                                            |                                      |
| Infrainguinal bypass                                 |                                      |
| Using autogenous graft material                      | Binary                               |
| Using synthetic graft material                       | Binary                               |
| Using composite graft material                       | Binary                               |
| Repair of leg arteries below the inguinal ligament   |                                      |
| Using autograft (e.g., vein patch) material          | Binary                               |
| Using synthetic (e.g., Dacron patch) material        | Binary                               |
| Without using the above material (e.g., embolectomy) | Binary                               |
| Year of surgery                                      | Restricted cubic spline with 3 knots |

**eTable 3.** Mixed-Effects Regression Model Examining the Adjusted Association Between Anesthetic Type and 30-Day Mortality Among the 20,988 Study Patients.

| <b>Predictor or Covariate</b>                                       | <b>Adjusted-OR (95% CI)</b>                        | <b>p-value</b> |
|---------------------------------------------------------------------|----------------------------------------------------|----------------|
| Use of neuraxial instead of general anesthesia                      | 0.68 (0.57 to 0.83)                                | <0.001         |
| <i>Demographics and hospital surgical volume</i>                    |                                                    |                |
| Female                                                              | 0.81 (0.69 to 0.95)                                | 0.009          |
| Urban instead of rural residence                                    | 1.03 (0.83 to 1.29)                                | 0.78           |
| Long-term care facility resident                                    | 1.59 (1.11 to 2.28)                                | 0.01           |
| Income quintile                                                     |                                                    |                |
| 1 – Lowest                                                          | 1.20 (0.95 to 1.51)                                | 0.12           |
| 2                                                                   | 0.97 (0.76 to 1.23)                                | 0.79           |
| 3                                                                   | 0.91 (0.70 to 1.16)                                | 0.44           |
| 4                                                                   | 1.01 (0.79 to 1.29)                                | 0.97           |
| 5 – Highest                                                         | Reference (1.00)                                   | NA             |
| Smoking cessation consultation in the year before surgery           | 0.86 (0.43 to 1.71)                                | 0.67           |
| Hospital-patient One-Year Mortality Risk score (per-point increase) | 1.06 (1.04 to 1.08)                                | <0.001         |
| <i>Comorbidities recorded in the 3-years before surgery</i>         |                                                    |                |
| Alcohol abuse                                                       | 1.11 (0.73 to 1.68)                                | 0.62           |
| Atrial fibrillation                                                 | 0.97 (0.78 to 1.21)                                | 0.81           |
| Blood loss anemia                                                   | 1.98 (1.64 to 2.39)                                | <0.001         |
| Cancer                                                              | 1.04 (0.78 to 1.39)                                | 0.78           |
| Cardiac valvular disease                                            | 1.05 (0.81 to 1.36)                                | 0.69           |
| Cerebrovascular disease                                             | 1.25 (0.95 to 1.63)                                | 0.11           |
| Chronic kidney disease                                              | 0.86 (0.65 to 1.63)                                | 0.28           |
| Chronic obstructive pulmonary disease                               | 0.95 (0.81 to 1.11)                                | 0.49           |
| Coagulopathy                                                        | 1.90 (1.48 to 2.45)                                | <0.001         |
| Deficiency anemia                                                   | 0.49 (0.23 to 1.01)                                | 0.05           |
| Dementia                                                            | 1.95 (1.34 to 2.83)                                | <0.001         |
| Depression                                                          | 0.57 (0.36 to 0.90)                                | 0.02           |
| Diabetes                                                            | 0.91 (0.78 to 1.07)                                | 0.26           |
| Dialysis                                                            | 2.45 (1.79 to 3.36)                                | <0.001         |
| Drug abuse                                                          | 1.70 (0.73 to 3.95)                                | 0.22           |
| Frailty                                                             | 0.62 (0.51 to 0.75)                                | <0.001         |
| Heart failure                                                       | 1.90 (1.59 to 2.26)                                | <0.001         |
| Hemiparesis or hemiplegia                                           | 0.89 (0.42 to 1.88)                                | 0.77           |
| Hypertension                                                        | 0.89 (0.71 to 1.11)                                | 0.31           |
| Liver disease                                                       | 1.15 (0.68 to 1.97)                                | 0.60           |
| Metastatic cancer                                                   | 1.66 (0.94 to 2.92)                                | 0.08           |
| Myocardial infarction                                               | 1.01 (0.82 to 1.23)                                | 0.95           |
| Obesity                                                             | 1.51 (0.99 to 2.29)                                | 0.05           |
| Peptic ulcer disease                                                | 1.13 (0.73 to 1.77)                                | 0.58           |
| Previous diagnosis of peripheral artery disease                     | 0.76 (0.64 to 0.91)                                | 0.002          |
| Psychosis                                                           | 1.27 (0.59 to 2.76)                                | 0.54           |
| Pulmonary circulatory disease                                       | 1.79 (1.27 to 2.53)                                | <0.001         |
| Rheumatic disease                                                   | 0.76 (0.40 to 1.47)                                | 0.42           |
| Venous thromboembolism                                              | 1.19 (0.72 to 1.97)                                | 0.51           |
| Weight loss                                                         | 1.70 (1.12 to 2.58)                                | 0.01           |
| <i>Healthcare resource use</i>                                      |                                                    |                |
| Emergency Department visit in last year                             | 0.88 (0.73 to 1.06)                                | 0.17           |
| Hospitalization in last year                                        | 0.74 (0.61 to 0.89)                                | 0.002          |
| Resource utilization band                                           |                                                    |                |
| 1 – Healthy user                                                    | 0.017 (1.04 <sup>-25</sup> to 2.65 <sup>21</sup> ) | 0.88           |
| 2 – Low morbidity                                                   | 0.32 (0.043 to 2.42)                               | 0.27           |
| 3 – Moderate                                                        | 0.27 (0.17 to 0.44)                                | <0.001         |

|                                                                         |                                   |                |
|-------------------------------------------------------------------------|-----------------------------------|----------------|
| 4 – High                                                                | 0.55 (0.44 to 0.70)               | <0.001         |
| 5 – Very high                                                           | Reference (1.00)                  | NA             |
| <i>Lower limb revascularization surgery</i>                             |                                   |                |
| <b>Urgency</b>                                                          |                                   |                |
| Elective                                                                | 0.22 (0.11 to 0.45)               | <0.001         |
| Urgent                                                                  | 0.55 (0.28 to 1.07)               | 0.08           |
| Emergent                                                                | 0.28 (0.03 to 2.24)               | 0.23           |
| Critical                                                                | Reference (1.00)                  | NA             |
| <b>Procedure</b>                                                        |                                   |                |
| <i>Infrainguinal bypass</i>                                             |                                   |                |
| Using autogenous graft material                                         | 0.22 (0.12 to 0.43)               | <0.001         |
| Using synthetic graft material                                          | 0.73 (0.41 to 1.29)               | 0.28           |
| Using composite graft material                                          | 0.78 (0.23 to 2.64)               | 0.69           |
| <i>Repair of leg arteries below the inguinal ligament</i>               |                                   |                |
| Using autograft (e.g., vein patch) material                             | 0.51 (0.13 to 2.00)               | 0.34           |
| Using synthetic (e.g., Dacron patch) material                           | 0.34 (0.04 to 2.82)               | 0.32           |
| Without using the above material (e.g., embolectomy)                    | 0.64 (0.35 to 1.18)               | 0.15           |
| <b>Spline and Interaction Terms</b>                                     | <b>Beta Coefficient (95% CI)*</b> | <b>p-value</b> |
| <i>Spline terms</i>                                                     |                                   |                |
| Age (linear segment)                                                    | -0.036 (-0.057 to -0.015)         | 0.001          |
| Age (spline segment 1)                                                  | 0.19 (0.090 to 0.28)              | <0.001         |
| Age 2 (spline segment 2)                                                | -0.82 (-1.44 to -0.21)            | 0.009          |
| Age 3 (spline segment 3)                                                | 1.08 (-0.13 to 2.29)              | 0.08           |
| Hospital lower limb revascularization surgery volume (linear segment)   | 0.00051 (0.00051 to 0.00051)      | <0.001         |
| Hospital lower limb revascularization surgery volume (spline segment 1) | -0.0023 (-0.0023 to -0.0023)      | <0.001         |
| Hospital lower limb revascularization surgery volume (spline segment 2) | 0.0050 (0.0050 to 0.0050)         | <0.001         |
| Hospital lower limb revascularization surgery volume (spline segment 3) | -0.0032 (-0.0032 to -0.0032)      | 0.75           |
| Year of surgery (linear segment)                                        | -0.0047 (-0.093 to 0.083)         | 0.92           |
| Year of surgery (spline segment 1)                                      | -0.032 (-0.13 to 0.066)           | 0.52           |
| <i>Interaction terms</i>                                                |                                   |                |
| <i>Infrainguinal bypass</i>                                             |                                   |                |
| Elective*using autogenous graft material                                | 1.08 (0.23 to 1.93)               | 0.01           |
| Urgent*using autogenous graft material                                  | 0.73 (-0.084 to 1.54)             | 0.08           |
| Emergent*using autogenous graft material                                | 1.67 (-0.58 to 3.91)              | 0.15           |
| Critical*using autogenous graft material                                | Reference (0)                     | NA             |
| Elective*using synthetic graft material                                 | 0.083 (-0.71 to 0.87)             | 0.84           |
| Urgent*using synthetic graft material                                   | 0.10 (-0.64 to 0.85)              | 0.79           |
| Emergent*using synthetic graft material                                 | 1.16 (-1.06 to 3.38)              | 0.31           |
| Critical*using synthetic graft material                                 | Reference (0)                     | NA             |
| Elective*using composite graft material                                 | 0.12 (-1.40 to 1.64)              | 0.88           |
| Urgent*using composite graft material                                   | -0.71 (-2.22 to 0.81)             | 0.36           |
| Emergent*using composite graft material                                 | 0.74 (-2.40 to 3.87)              | 0.64           |
| Critical*using composite graft material                                 | Reference (0)                     | NA             |
| <i>Repair of leg arteries below the inguinal ligament</i>               |                                   |                |
| Elective*using autograft material                                       | 0.12 (-0.99 to 1.23)              | 0.84           |
| Urgent*using autograft material                                         | 0.51 (-0.46 to 1.47)              | 0.30           |
| Emergent*using autograft material                                       | 1.59 (-1.19 to 4.38)              | 0.26           |
| Critical*using autograft material                                       | Reference (0)                     | NA             |
| Elective*using synthetic material                                       | 1.28 (-1.12 to 3.67)              | 0.30           |

|                                           |                      |      |
|-------------------------------------------|----------------------|------|
| Urgent*using synthetic material           | 1.15 (-1.23 to 3.53) | 0.34 |
| Emergent*using synthetic material         | 3.17 (-0.71 to 7.05) | 0.11 |
| Critical*using synthetic material         | Reference (0)        | NA   |
| Elective*without using the above material | 0.71 (-0.17 to 1.58) | 0.11 |
| Urgent*without using the above material   | 0.32 (-0.59 to 1.13) | 0.44 |
| Emergent*without using the above material | 0.67 (-1.79 to 3.13) | 0.59 |
| Critical*without using the above material | Reference (0)        | NA   |

Where CI indicates confidence interval; NA, not applicable; and OR, odds ratio.

\*Beta coefficients instead of ORs were provided for spline and interaction terms as they cannot be directly interpreted on their own.

**eTable 4.** Characteristics of the Propensity Score-Matched Cohorts.

| Characteristic                                              | No. (%) of Propensity Score-Matched Patients Receiving Anesthesia |                    | Absolute Standardized Difference <sup>a</sup> |
|-------------------------------------------------------------|-------------------------------------------------------------------|--------------------|-----------------------------------------------|
|                                                             | Neuraxial (n=6,453)                                               | General (n=14,535) |                                               |
| <b>Demographics</b>                                         |                                                                   |                    |                                               |
| Age, mean (SD), years                                       | 70.0 (11.0)                                                       | 70.0 (11.0)        | 0                                             |
| Female                                                      | 2,104 (32.6)                                                      | 4,840 (33.3)       | 0.01                                          |
| Rural residence                                             | 1,123 (17.4)                                                      | 2,486 (17.1)       | 0.01                                          |
| Long-term care facility resident                            | 123 (1.9)                                                         | 320 (2.2)          | 0.02                                          |
| Income quintile                                             |                                                                   |                    |                                               |
| 1 – Lowest                                                  | 1,536 (23.8)                                                      | 3,605 (24.8)       | 0.02                                          |
| 2                                                           | 1,433 (22.2)                                                      | 3,067 (21.1)       | 0.03                                          |
| 3                                                           | 1,233 (19.1)                                                      | 2,791 (19.2)       | 0                                             |
| 4                                                           | 1,181 (18.3)                                                      | 2,689 (18.5)       | 0                                             |
| 5 – Highest                                                 | 1,071 (16.6)                                                      | 2,398 (16.5)       | 0                                             |
| Smoking cessation consultation in the year before surgery   | 174 (2.7)                                                         | 378 (2.6)          | 0.01                                          |
| Hospital-patient One-Year Mortality Risk score, mean (SD)   | 32.0 (6.0)                                                        | 31.0 (6.0)         | 0                                             |
| <b>Comorbidities recorded in the 3-years before surgery</b> |                                                                   |                    |                                               |
| Alcohol abuse                                               | 174 (2.7)                                                         | 392 (2.7)          | 0                                             |
| Atrial fibrillation                                         | 574 (8.9)                                                         | 1,265 (8.7)        | 0.01                                          |
| Blood loss anemia                                           | 736 (11.4)                                                        | 1,686 (11.6)       | 0.01                                          |
| Cancer                                                      | 387 (6.0)                                                         | 799 (5.5)          | 0.02                                          |
| Cardiac valvular disease                                    | 226 (3.5)                                                         | 523 (3.6)          | 0.01                                          |
| Cerebrovascular disease                                     | 432 (6.7)                                                         | 930 (6.4)          | 0.01                                          |
| Chronic kidney disease                                      | 555 (8.6)                                                         | 1,206 (8.3)        | 0.01                                          |
| Chronic obstructive pulmonary disease                       | 2,575 (39.9)                                                      | 5,770 (39.7)       | 0                                             |
| Coagulopathy                                                | 213 (3.3)                                                         | 509 (3.5)          | 0.01                                          |
| Deficiency anemia                                           | 58 (0.9)                                                          | 145 (1.0)          | 0.01                                          |
| Dementia                                                    | 129 (2.0)                                                         | 276 (1.9)          | 0.01                                          |
| Depression                                                  | 174 (2.7)                                                         | 436 (3.0)          | 0.02                                          |
| Diabetes                                                    | 3,123 (48.4)                                                      | 6,788 (46.7)       | 0.03                                          |
| Dialysis                                                    | 303 (4.7)                                                         | 698 (4.8)          | 0                                             |
| Drug abuse                                                  | 26 (0.4)                                                          | 58 (0.4)           | 0                                             |
| Frailty                                                     | 1,342 (20.8)                                                      | 3,009 (20.7)       | 0                                             |
| Heart failure                                               | 1,536 (23.8)                                                      | 3,256 (22.4)       | 0.03                                          |
| Hemiparesis or hemiplegia                                   | 52 (0.8)                                                          | 116 (0.8)          | 0                                             |
| Hypertension                                                | 5,201 (80.6)                                                      | 11,599 (79.8)      | 0.02                                          |
| Liver disease                                               | 71 (1.1)                                                          | 189 (1.3)          | 0.02                                          |
| Metastatic cancer                                           | 52 (0.8)                                                          | 116 (0.8)          | 0                                             |
| Myocardial infarction                                       | 871 (13.5)                                                        | 1,919 (13.2)       | 0.01                                          |
| Obesity                                                     | 136 (2.1)                                                         | 305 (2.1)          | 0                                             |
| Peptic ulcer disease                                        | 136 (2.1)                                                         | 291 (2.0)          | 0.01                                          |
| Previous diagnosis of peripheral artery disease             | 2,484 (38.5)                                                      | 5,741 (39.5)       | 0.02                                          |
| Psychosis                                                   | 19 (0.3)                                                          | 58 (0.4)           | 0.02                                          |
| Pulmonary circulatory disease                               | 90 (1.4)                                                          | 218 (1.5)          | 0.01                                          |
| Rheumatic disease                                           | 71 (1.1)                                                          | 174 (1.2)          | 0.01                                          |
| Venous thromboembolism                                      | 77 (1.2)                                                          | 174 (1.2)          | 0                                             |
| Weight loss                                                 | 103 (1.6)                                                         | 261 (1.8)          | 0.02                                          |
| <b>Healthcare resource use</b>                              |                                                                   |                    |                                               |
| Emergency Department visit in last year                     | 4,027 (62.4)                                                      | 9,070 (62.4)       | 0                                             |
| Hospitalization in last year                                | 2,626 (40.7)                                                      | 5,930 (40.8)       | 0                                             |



|                                                         |              |               |      |
|---------------------------------------------------------|--------------|---------------|------|
| Resource utilization band                               |              |               |      |
| 1, 2, or 3 – Healthy user or low or moderate morbidity  | 820 (12.7)   | 1,759 (12.1)  | 0.02 |
| 4 – High                                                | 1,484 (23.0) | 3,358 (23.1)  | 0    |
| 5 – Very high                                           | 4,136 (64.1) | 9,433 (64.9)  | 0.02 |
| <b>Lower limb revascularization surgery</b>             |              |               |      |
| Hospital lower limb revascularization volume, mean (SD) | 1440 (771)   | 1440 (772)    | 0    |
| Urgency                                                 |              |               |      |
| Elective                                                | 4,227 (65.5) | 8,881 (61.1)  | 0.09 |
| Urgent                                                  | 1,820 (28.2) | 4,172 (28.7)  | 0.01 |
| Emergent                                                | 110 (1.7)    | 320 (2.2)     | 0.04 |
| Critical                                                | 419 (6.5)    | 1,163 (8.0)   | 0.06 |
| Procedure                                               |              |               |      |
| Infringuinal bypass                                     | 5,510 (85.4) | 12,297 (84.6) | 0.02 |
| Using autogenous graft material                         | 3,297 (51.1) | 7,704 (53.0)  | 0.04 |
| Using synthetic graft material                          | 2,065 (32.0) | 4,288 (29.5)  | 0.05 |
| Using composite graft material                          | 148 (2.3)    | 305 (2.1)     | 0.02 |
| Repair of leg arteries below the inguinal ligament      | 729 (11.3)   | 1,788 (12.3)  | 0.03 |
| Using autograft (e.g., vein patch) material             | 232 (3.6)    | 610 (4.2)     | 0.03 |
| Using synthetic (e.g., Dacron patch) material           | 181 (2.8)    | 480 (3.3)     | 0.03 |
| Without using the above material (e.g., embolectomy)    | 316 (4.9)    | 698 (4.8)     | 0    |

Where NA indicates not applicable and SD, standard deviation.

<sup>a</sup>The standardized difference allows comparison of the difference in prevalence of binary covariates, or the average of continuous covariates, between treatment groups without the influence of sample size; values >0.1 indicate substantive differences.

<sup>b</sup>Privacy legislation does not allow reporting of cell sizes  $\leq 6$  or cells that allow calculation of a cell  $\leq 6$ .

**eTable 5.** Characteristics of the 13,176 Study Patients  $\geq 65$  Years Old With Outpatient Prescription Drug Data Stratified By Anesthetic Technique.

| Characteristic                                                               | No. (%) of Patients Receiving Anesthesia |                   | Absolute Standardized Difference <sup>a</sup> |
|------------------------------------------------------------------------------|------------------------------------------|-------------------|-----------------------------------------------|
|                                                                              | Neuraxial (n=4,449)                      | General (n=8,727) |                                               |
| <b>Demographics</b>                                                          |                                          |                   |                                               |
| Age, mean (SD), years                                                        | 76.3 (6.7)                               | 75.7 (6.5)        | 0.09                                          |
| Female                                                                       | 1,574 (35.4)                             | 3,160 (36.2)      | 0.02                                          |
| Rural residence                                                              | 740 (16.6)                               | 1,420 (16.3)      | 0.01                                          |
| Long-term care facility resident                                             | 143 (3.2)                                | 206 (2.4)         | 0.05                                          |
| Income quintile                                                              |                                          |                   |                                               |
| 1 – Lowest                                                                   | 962 (21.7)                               | 1,900 (21.8)      | 0.00                                          |
| 2                                                                            | 977 (22.0)                               | 1,910 (21.9)      | 0.00                                          |
| 3                                                                            | 871 (19.6)                               | 1,676 (19.2)      | 0.01                                          |
| 4                                                                            | 845 (19.0)                               | 1,616 (18.6)      | 0.01                                          |
| 5 – Highest                                                                  | 782 (17.6)                               | 1,607 (18.5)      | 0.02                                          |
| Smoking cessation consultation in the year before surgery                    | 75 (1.7)                                 | 136 (1.6)         | 0.01                                          |
| Hospital-patient One-Year Mortality Risk score, mean (SD)                    | 33.5 (5.5)                               | 33.4 (5.8)        | 0.02                                          |
| <b>Comorbidities recorded in the 3-years before surgery</b>                  |                                          |                   |                                               |
| Alcohol abuse                                                                | 105 (2.4)                                | 200 (2.3)         | 0.00                                          |
| Atrial fibrillation                                                          | 478 (10.7)                               | 1,003 (11.5)      | 0.01                                          |
| Blood loss anemia                                                            | 572 (12.9)                               | 1,126 (12.9)      | 0.03                                          |
| Cancer                                                                       | 288 (6.5)                                | 608 (7.0)         | 0.00                                          |
| Cardiac valvular disease                                                     | 181 (4.1)                                | 675 (7.7)         | 0.02                                          |
| Cerebrovascular disease                                                      | 324 (7.3)                                | 638 (7.3)         | 0.15                                          |
| Chronic kidney disease                                                       | 431 (9.7)                                | 687 (7.9)         | 0.00                                          |
| Chronic obstructive pulmonary disease                                        | 1,921 (43.2)                             | 3,497 (40.1)      | 0.06                                          |
| Coagulopathy                                                                 | 146 (3.3)                                | 408 (4.7)         | 0.06                                          |
| Deficiency anemia                                                            | 49 (1.1)                                 | 98 (1.1)          | 0.07                                          |
| Dementia                                                                     | 120 (2.7)                                | 205 (2.4)         | 0.00                                          |
| Depression                                                                   | 115 (2.6)                                | 200 (2.3)         | 0.02                                          |
| Diabetes                                                                     | 2,165 (48.7)                             | 4,014 (46.0)      | 0.02                                          |
| Dialysis                                                                     | 209 (4.7)                                | 315 (3.6)         | 0.05                                          |
| Drug abuse                                                                   | 11 (0.3)                                 | 19 (0.2)          | 0.06                                          |
| Frailty                                                                      | 1,097 (24.7)                             | 2,007 (23.0)      | 0.02                                          |
| Heart failure                                                                | 1,255 (28.2)                             | 2,300 (26.4)      | 0.04                                          |
| Hemiparesis or hemiplegia                                                    | 34 (0.8)                                 | 73 (0.8)          | 0.04                                          |
| Hypertension                                                                 | 3,832 (86.1)                             | 7,633 (87.5)      | 0.00                                          |
| Liver disease                                                                | 46 (1.0)                                 | 77 (0.9)          | 0.04                                          |
| Metastatic cancer                                                            | 31 (0.7)                                 | 79 (0.9)          | 0.01                                          |
| Myocardial infarction                                                        | 602 (13.5)                               | 1,221 (14.0)      | 0.02                                          |
| Obesity                                                                      | 61 (1.4)                                 | 141 (1.6)         | 0.01                                          |
| Peptic ulcer disease                                                         | 105 (2.4)                                | 179 (2.1)         | 0.02                                          |
| Previous diagnosis of peripheral artery disease                              | 1,796 (40.4)                             | 2,936 (33.6)      | 0.02                                          |
| Psychosis                                                                    | 17 (0.4)                                 | 46 (0.5)          | 0.14                                          |
| Pulmonary circulatory disease                                                | 71 (1.6)                                 | 180 (2.1)         | 0.01                                          |
| Rheumatic disease                                                            | 51 (1.2)                                 | 113 (1.3)         | 0.04                                          |
| Venous thromboembolism                                                       | 42 (0.9)                                 | 104 (1.2)         | 0.01                                          |
| Weight loss                                                                  | 85 (1.9)                                 | 152 (1.7)         | 0.03                                          |
| <b>Outpatient prescription drugs received in the 6-months before surgery</b> |                                          |                   |                                               |
| Total no. of unique drugs, median (IQR)                                      | 7 (5-10)                                 | 7 (4-10)          | 0.01                                          |

|                                                             |                |                |      |
|-------------------------------------------------------------|----------------|----------------|------|
| Anticoagulant                                               | 749 (16.8)     | 1,612 (18.5)   | 0.04 |
| Antiplatelet                                                | 590 (13.3)     | 1,513 (17.3)   | 0.11 |
| Antipsychotic                                               | 108 (2.4)      | 204 (2.3)      | 0.01 |
| Benzodiazepine                                              | 934 (21.0)     | 1,653 (18.9)   | 0.05 |
| Insulin                                                     | 653 (14.7)     | 1,129 (12.9)   | 0.05 |
| Opioid                                                      | 2,188 (49.2)   | 4,123 (47.2)   | 0.04 |
| Oral corticosteroid                                         | 353 (7.9)      | 713 (8.2)      | 0.01 |
| Oral diabetes medication                                    | 1,248 (28.1)   | 2,261 (25.9)   | 0.05 |
| <b>Healthcare resource use</b>                              |                |                |      |
| Emergency Department visit in last year                     | 2,830 (63.6)   | 5,455 (62.5)   | 0.02 |
| Hospitalization in last year                                | 1,861 (41.8)   | 3,724 (42.7)   | 0.02 |
| <b>Resource utilization band</b>                            |                |                |      |
| 1 – Healthy user                                            | _ <sup>b</sup> | _ <sup>b</sup> | N/A  |
| 2 – Low morbidity                                           | _ <sup>b</sup> | _ <sup>b</sup> | N/A  |
| 3 – Moderate                                                | 490 (11.0)     | 780 (8.9)      | 0.07 |
| 4 – High                                                    | 985 (22.1)     | 1,948 (22.3)   | 0.00 |
| 5 – Very high                                               | 2,974 (66.9)   | 5,998 (68.7)   | 0.04 |
| <b>Lower limb revascularization surgery</b>                 |                |                |      |
| Hospital lower limb revascularization volume, mean (SD)     | 1,395 (784)    | 1,469 (846)    | 0.09 |
| <b>Urgency</b>                                              |                |                |      |
| Elective                                                    | 2,749 (61.8)   | 5,146 (59.0)   | 0.06 |
| Urgent                                                      | 1,375 (30.9)   | 2,523 (28.9)   | 0.04 |
| Emergent                                                    | 74 (1.7)       | 182 (2.1)      | 0.03 |
| Critical                                                    | 251 (5.6)      | 876 (10.0)     | 0.16 |
| <b>Procedure</b>                                            |                |                |      |
| Infrainguinal bypass                                        | 3,841 (86.3)   | 6,637 (76.1)   | 0.26 |
| Using autogenous graft material                             | 2,319 (52.1)   | 3,761 (43.1)   | 0.18 |
| Using synthetic graft material                              | 1,420 (31.9)   | 2,635 (30.2)   | 0.04 |
| Using composite graft material                              | 102 (2.3)      | 241 (2.8)      | 0.03 |
| Repair of leg arteries below the inguinal ligament          | 448 (10.1)     | 1,800 (20.6)   | 0.29 |
| Using autograft (e.g., vein patch) material                 | 154 (3.5)      | 912 (10.5)     | 0.28 |
| Using synthetic (e.g., Dacron patch) material               | 109 (2.5)      | 328 (3.8)      | 0.07 |
| Without using the above material (e.g., thromboembolectomy) | 185 (4.2)      | 560 (6.4)      | 0.10 |

Where NA indicates not applicable; IQR, interquartile range; no., number; and SD, standard deviation.

<sup>a</sup>The standardized difference allows comparison of the difference in prevalence of binary covariates, or the average of continuous covariates, between treatment groups without the influence of sample size; values >0.1 indicate substantive differences.

<sup>b</sup>Privacy legislation does not allow reporting of cell sizes  $\leq 6$  or cells that allow calculation of a cell  $\leq 6$ .

**eTable 6.** Mixed-Effects Regression Model Examining the Adjusted Association Between Anesthetic Type and 30-Day Mortality Among the 13,176 Patients  $\geq 65$  Years-Old With Outpatient Prescription Drug Data.

| <b>Predictor or Covariate</b>                                                | <b>Adjusted-OR (95% CI)</b> | <b>p-value</b> |
|------------------------------------------------------------------------------|-----------------------------|----------------|
| Use of neuraxial instead of general anesthesia                               | 0.74 (0.60 to 0.90)         | 0.003          |
| <i>Demographics and hospital surgical volume</i>                             |                             |                |
| Female                                                                       | 0.77 (0.64 to 0.92)         | 0.004          |
| Urban instead of rural residence                                             | 0.93 (0.73 to 1.19)         | 0.56           |
| Long-term care facility resident                                             | 1.66 (1.14 to 2.43)         | 0.009          |
| Income quintile                                                              |                             |                |
| 1 – Lowest                                                                   | 1.06 (0.82 to 1.36)         | 0.68           |
| 2                                                                            | 0.91 (0.70 to 1.18)         | 0.47           |
| 3                                                                            | 0.82 (0.63 to 1.09)         | 0.17           |
| 4                                                                            | 0.91 (0.70 to 1.19)         | 0.50           |
| 5 – Highest                                                                  | Reference (1.00)            |                |
| Smoking cessation consultation in the year before surgery                    | 0.88 (0.35 to 2.22)         | 0.79           |
| Hospital-patient One-Year Mortality Risk score (per-point increase)          | 1.05 (1.03 to 1.07)         | <0.001         |
| <i>Comorbidities recorded in the 3-years before surgery</i>                  |                             |                |
| Alcohol abuse                                                                | 1.13 (0.69 to 1.87)         | 0.62           |
| Atrial fibrillation                                                          | 0.96 (0.74 to 1.24)         | 0.76           |
| Blood loss anemia                                                            | 1.98 (1.60 to 2.44)         | <0.001         |
| Cancer                                                                       | 0.99 (0.72 to 1.36)         | 0.93           |
| Cardiac valvular disease                                                     | 1.03 (0.77 to 1.38)         | 0.83           |
| Cerebrovascular disease                                                      | 1.10 (0.82 to 1.48)         | 0.54           |
| Chronic kidney disease                                                       | 0.90 (0.66 to 1.22)         | 0.49           |
| Chronic obstructive pulmonary disease                                        | 0.94 (0.79 to 1.12)         | 0.47           |
| Coagulopathy                                                                 | 1.52 (1.12 to 2.06)         | 0.007          |
| Deficiency anemia                                                            | 0.57 (0.27 to 1.18)         | 0.13           |
| Dementia                                                                     | 2.10 (1.43 to 3.08)         | <0.001         |
| Depression                                                                   | 0.71 (0.41 to 1.21)         | 0.21           |
| Diabetes                                                                     | 0.91 (0.73 to 1.15)         | 0.45           |
| Dialysis                                                                     | 2.38 (1.66 to 3.43)         | <0.001         |
| Drug abuse                                                                   | 3.12 (1.14 to 8.54)         | 0.03           |
| Frailty                                                                      | 0.63 (0.51 to 0.77)         | <0.001         |
| Heart failure                                                                | 1.81 (1.49 to 2.20)         | <0.001         |
| Hemiparesis or hemiplegia                                                    | 0.88 (0.38 to 2.05)         | 0.76           |
| Hypertension                                                                 | 0.79 (0.61 to 1.04)         | 0.09           |
| Liver disease                                                                | 1.45 (0.76 to 2.76)         | 0.26           |
| Metastatic cancer                                                            | 1.38 (0.68 to 2.81)         | 0.37           |
| Myocardial infarction                                                        | 1.03 (0.83 to 1.29)         | 0.78           |
| Obesity                                                                      | 1.51 (0.87 to 2.62)         | 0.15           |
| Peptic ulcer disease                                                         | 1.23 (0.76 to 1.99)         | 0.39           |
| Previous diagnosis of peripheral artery disease                              | 0.80 (0.66 to 0.97)         | 0.03           |
| Psychosis                                                                    | 1.26 (0.49 to 3.21)         | 0.63           |
| Pulmonary circulatory disease                                                | 1.67 (1.10 to 2.54)         | 0.02           |
| Rheumatic disease                                                            | 0.86 (0.43 to 1.70)         | 0.66           |
| Venous thromboembolism                                                       | 1.36 (0.75 to 2.46)         | 0.30           |
| Weight loss                                                                  | 1.49 (0.94 to 2.37)         | 0.09           |
| <i>Outpatient prescription drugs received in the 6-months before surgery</i> |                             |                |
| Anticoagulant                                                                | 0.96 (0.77 to 1.21)         | 0.73           |
| Antiplatelet                                                                 | 1.16 (0.92 to 1.47)         | 0.20           |
| Antipsychotic                                                                | 0.79 (0.47 to 1.32)         | 0.36           |
| Benzodiazepine                                                               | 0.88 (0.71 to 1.09)         | 0.24           |
| Insulin                                                                      | 0.86 (0.65 to 1.14)         | 0.30           |
| Opioid                                                                       | 0.81 (0.67 to 0.97)         | 0.02           |

|                                                                         |                                   |                |
|-------------------------------------------------------------------------|-----------------------------------|----------------|
| Oral corticosteroid                                                     | 1.26 (0.96 to 1.66)               | 0.09           |
| Oral diabetes medication                                                | 0.96 (0.75 to 1.24)               | 0.76           |
| <i>Healthcare resource use</i>                                          |                                   |                |
| Emergency Department visit in last year                                 | 0.95 (0.77 to 1.18)               | 0.66           |
| Hospitalization in last year                                            | 0.70 (0.56 to 0.86)               | <0.001         |
| Resource utilization band                                               |                                   |                |
| 2 – Low morbidity                                                       | 0.019 (0 to 2.82 <sup>22</sup> )  | 0.89           |
| 3 – Moderate                                                            | 0.23 (0.12 to 0.42)               | <0.001         |
| 4 – High                                                                | 0.53 (0.41 to 0.69)               | <0.001         |
| 5 – Very high                                                           | Reference (1.00)                  | NA             |
| <i>Lower limb revascularization surgery</i>                             |                                   |                |
| Urgency                                                                 |                                   |                |
| Elective                                                                | 0.74 (0.60 to 0.90)               | 0.003          |
| Urgent                                                                  | 0.20 (0.091 to 0.46)              | <0.001         |
| Emergent                                                                | 0.46 (0.21 to 1.02)               | 0.05           |
| Critical                                                                | Reference (1.00)                  | NA             |
| Procedure                                                               |                                   |                |
| Infrainguinal bypass                                                    |                                   |                |
| Using autogenous graft material                                         | 0.25 (0.12 to 0.53)               | <0.001         |
| Using synthetic graft material                                          | 0.71 (0.36 to 1.41)               | 0.33           |
| Using composite graft material                                          | 1.06 (0.17 to 2.89)               | 0.63           |
| Repair of leg arteries below the inguinal ligament                      |                                   |                |
| Using autograft (e.g., vein patch) material                             | 0.0038 (0.000000029 to 511.78)    | 0.36           |
| Using synthetic (e.g., Dacron patch) material                           | 0.0064 (0.000000033 to 12570.40)  | 0.49           |
| Without using the above material (e.g., embolectomy)                    | 0.54 (0.19 to 1.48)               | 0.23           |
| <b>Spline and Interaction Terms</b>                                     | <b>Beta Coefficient (95% CI)*</b> | <b>p-value</b> |
| <i>Spline terms</i>                                                     |                                   |                |
| Age (linear segment)                                                    | 0.17 (0.033 to 0.31)              | 0.01           |
| Age (spline segment 1)                                                  | -0.75 (-1.64 to 0.13)             | 0.09           |
| Age 2 (spline segment 2)                                                | 1.96 (-0.83 to 4.74)              | 0.17           |
| Age 3 (spline segment 3)                                                | -1.35 (-4.17 to 1.48)             | 0.35           |
| Total no. of unique drugs (linear segment)                              | -0.059 (-0.19 to 0.070)           | 0.37           |
| Total no. of unique drugs (spline segment 1)                            | 0.31 (-0.45 to 1.07)              | 0.42           |
| Total no. of unique drugs (spline segment 2)                            | -0.73 (-4.72 to 3.27)             | 0.72           |
| Total no. of unique drugs (spline segment 3)                            | -0.028 (-4.91 to 4.85)            | 0.99           |
| Hospital lower limb revascularization surgery volume (linear segment)   | 0.00047 (0.00047 to 0.00047)      | <0.001         |
| Hospital lower limb revascularization surgery volume (spline segment 1) | -0.0022 (-0.0022 to -0.0022)      | <0.001         |
| Hospital lower limb revascularization surgery volume (spline segment 2) | 0.0047 (0.0047 to 0.0047)         | <0.001         |
| Hospital lower limb revascularization surgery volume (spline segment 3) | -0.0026 (-0.024 to 0.019)         | 0.81           |
| Year of surgery (linear segment)                                        | -0.021 (-0.12 to 0.080)           | 0.68           |
| Year of surgery (spline segment 1)                                      | -0.018 (-0.13 to 0.095)           | 0.75           |
| <i>Interaction terms</i>                                                |                                   |                |
| Infrainguinal bypass                                                    |                                   |                |
| Elective*using autogenous graft material                                | 1.09 (0.12 to 2.05)               | 0.03           |
| Urgent*using autogenous graft material                                  | 0.82 (-0.12 to 1.76)              | 0.09           |
| Emergent*using autogenous graft material                                | 5.14 (-7.26 to 17.55)             | 0.42           |
| Critical*using autogenous graft material                                | Reference (0)                     | NA             |

|                                                    |                        |      |
|----------------------------------------------------|------------------------|------|
| Elective*using synthetic graft material            | 0.25 (-0.66 to 1.16)   | 0.59 |
| Urgent*using synthetic graft material              | 0.28 (-0.60 to 1.16)   | 0.53 |
| Emergent*using synthetic graft material            | 4.73 (-7.67 to 17.13)  | 0.45 |
| Critical*using synthetic graft material            | Reference (0)          | NA   |
| Elective*using composite graft material            | -0.13 (-1.95 to 1.68)  | 0.89 |
| Urgent*using composite graft material              | -0.45 (-2.18 to 1.28)  | 0.61 |
| Emergent*using composite graft material            | 4.24 (-8.38 to 16.85)  | 0.51 |
| Critical*using composite graft material            | Reference (0)          | NA   |
| Repair of leg arteries below the inguinal ligament |                        |      |
| Elective*using autograft material                  | 6.24 (-5.60 to 18.07)  | 0.30 |
| Urgent*using autograft material                    | 5.32 (-6.52 to 17.16)  | 0.38 |
| Emergent*using autograft material                  | 10.88 (-6.36 to 28.13) | 0.22 |
| Critical*using autograft material                  | Reference (0)          | NA   |
| Elective*using synthetic material                  | 5.50 (-9.04 to 20.03)  | 0.46 |
| Urgent*using synthetic material                    | 5.38 (-9.16 to 19.92)  | 0.47 |
| Emergent*using synthetic material                  | 10.47 (-8.75 to 29.68) | 0.29 |
| Critical*using synthetic material                  | Reference (0)          | NA   |
| Elective*without using the above material          | 0.29 (-1.17 to 1.76)   | 0.70 |
| Urgent*without using the above material            | 1.04 (-0.22 to 2.30)   | 0.11 |
| Emergent*without using the above material          | 5.53 (-7.09 to 18.14)  | 0.39 |
| Critical*without using the above material          | Reference (0)          | NA   |

Where CI indicates confidence interval; NA, not applicable; and OR, odds ratio.

\*Beta coefficients instead of ORs were provided for spline and interaction terms as they cannot be directly interpreted on their own.

**eTable 7.** Incidence of Secondary Outcomes and Results of Mixed-Effects Regression Models Examining Differences in These Outcomes Between Groups.

| Secondary Outcome                                                   | Incidence, No./Total (%) |                       | Unadjusted OR<br>(95% CI) | Unadjusted Absolute<br>Difference (95% CI) | p-value for<br>Unadjusted<br>Comparison | Adjusted OR<br>(95% CI) | p-value for<br>Adjusted<br>Comparison |
|---------------------------------------------------------------------|--------------------------|-----------------------|---------------------------|--------------------------------------------|-----------------------------------------|-------------------------|---------------------------------------|
|                                                                     | Neuraxial<br>Anesthesia  | General<br>Anesthesia |                           |                                            |                                         |                         |                                       |
| In-hospital cardiac, pulmonary, or renal complications <sup>a</sup> | 428 (6.6)                | 1261 (8.6)            | 0.74 (0.66 to 0.83)       | -2.0% (-1.3% to 2.8%)                      | <0.001                                  | 0.73 (0.63 to 0.85)     | <0.001                                |
| Major adverse cardiac event <sup>b</sup>                            | 255 (3.9)                | 720 (4.9)             | 0.80 (0.69 to 0.92)       | -1.0% (-0.4% to -1.6%)                     | <0.001                                  | 0.72 (0.60 to 0.87)     | <0.001                                |
| Pneumonia                                                           | 77 (1.2)                 | 234 (1.6)             | 0.74 (0.57 to 0.96)       | -0.4% (-0.1% to -0.7%)                     | 0.02                                    | 0.81 (0.60 to 1.11)     | 0.19                                  |
| Venous thromboembolism                                              | 15 (0.2)                 | 80 (0.5)              | 0.42 (0.24 to 0.73)       | -0.3% (-0.2% to -0.5%)                     | 0.001                                   | - <sup>c</sup>          | - <sup>c</sup>                        |
| Acute kidney injury                                                 | 41 (0.6)                 | 191 (1.3)             | 0.48 (0.34 to 0.67)       | -0.7% (-0.04% to -0.9%)                    | <0.001                                  | - <sup>c</sup>          | - <sup>c</sup>                        |
| Cerebrovascular event <sup>d</sup>                                  | 6 (0.1)                  | 35 (0.2)              | 0.38 (0.16 to 0.90)       | -0.1% (-0.04% to -0.3%)                    | 0.03                                    | - <sup>c</sup>          | - <sup>c</sup>                        |
| Hospital readmissions                                               | 743 (11.4)               | 1669 (11.4)           | 1.00 (0.91 to 1.10)       | 0% (-1.0% to 0.9%)                         | 0.98                                    | 0.59 (0.32 to 1.10)     | 0.11                                  |

Where CI indicates confidence interval and OR, odds ratio.

<sup>a</sup>We decided *a priori* to analyze the adjusted odds of in-hospital cardiopulmonary and renal complications as a composite outcome to improve power.

<sup>b</sup>Includes acute coronary syndrome, heart failure, ventricular arrhythmia, or cardiac arrest.

<sup>c</sup>Number of events was too low to allow for fully-adjusted regression modeling.

<sup>d</sup>*Post-hoc* analysis; includes transient ischemic attack and ischemic or hemorrhagic stroke.

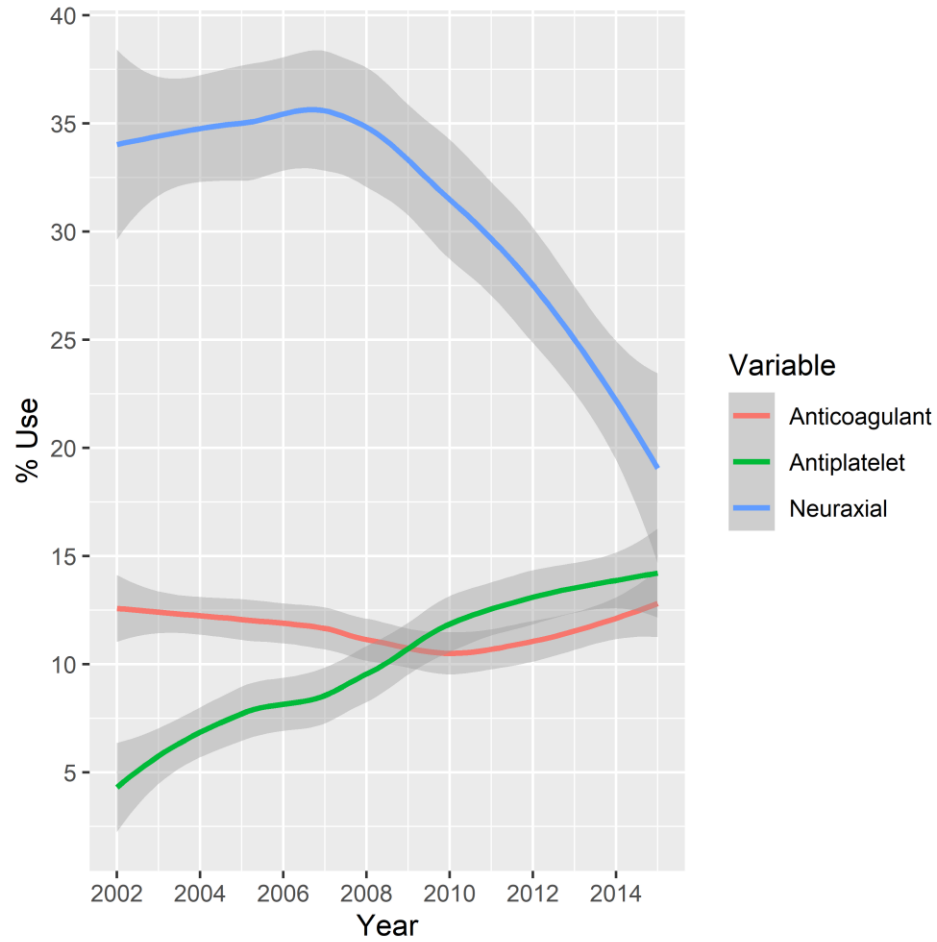

**eFigure 1.** Loess smoothed plot of the percentage of neuraxial anesthesia, anticoagulant, and antiplatelet use across the study period. Shaded areas around the plotted line represent 95% confidence intervals.
